# Supplementary material for: Boosting the oxygen vacancies in ZnO–Co3O4 composite by copper doping for bisphenol A abatement using persulfate
Source: Royal Society of Chemistry journal article supplement (doi:10.1039/d4ce00971a), 2024-11-20
Supplement: d4ce00971a1.pdf [file d4ce00971a1.pdf]

## Boosted oxygen vacancy in ZnO-Co<sub>3</sub>O<sub>4</sub> composite by copper doping for Bisphenol A abatement by persulfate

Lei Bai <sup>ab\*</sup>, Hui Yan <sup>b#</sup>, Jiao Wang <sup>c#</sup>, Qihang Wu <sup>a</sup>, Guiling Wang <sup>ab</sup>, Yi Huang <sup>c</sup>, Bentian Zhang <sup>ab\*</sup>

<sup>a</sup> College of Chemistry and Materials Engineering, Anhui Science and Technology University, Bengbu, Anhui, 233030, China

<sup>b</sup> Anhui Province Quartzs and Purification and Photovoltaic Glass Engineering Research Center, Chuzhou, 233100, China

<sup>c</sup> College of Food Engineering, Anhui Science and Technology University, Fengyang, Anhui, 233031, China

Email: baileiwj2014@163.com; zhangbt@ahstu.edu.cn

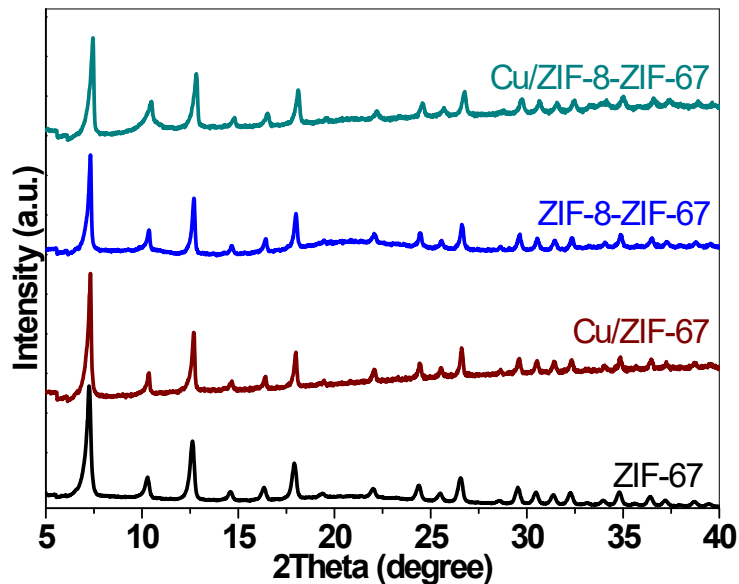

SFig.1 XRD patterns of the different precursors.

STable 1 ICP-AES data of element content in the copper doped samples.

| Co (wt.%) | Cu (wt.%) | Zn (wt.%) |
|-----------|-----------|-----------|
|-----------|-----------|-----------|

|                                           |      |      |      |
|-------------------------------------------|------|------|------|
| Cu-Co <sub>3</sub> O <sub>4</sub> /NC     | 57.3 | 12.2 | /    |
| Cu-ZnO-Co <sub>3</sub> O <sub>4</sub> /NC | 24.5 | 4.7  | 32.1 |

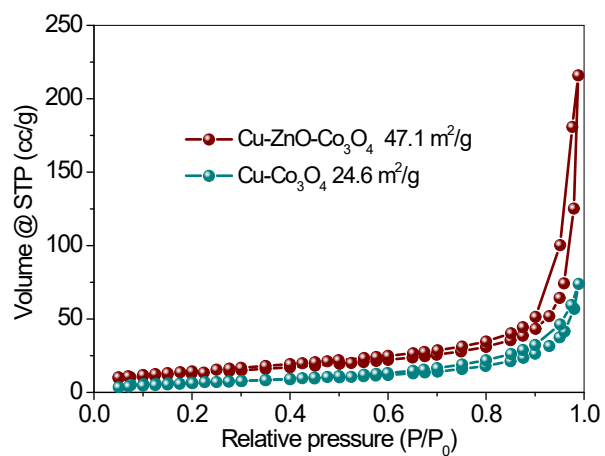

**SFig. 2** N<sub>2</sub> adsorption-desorption isotherms of the samples.

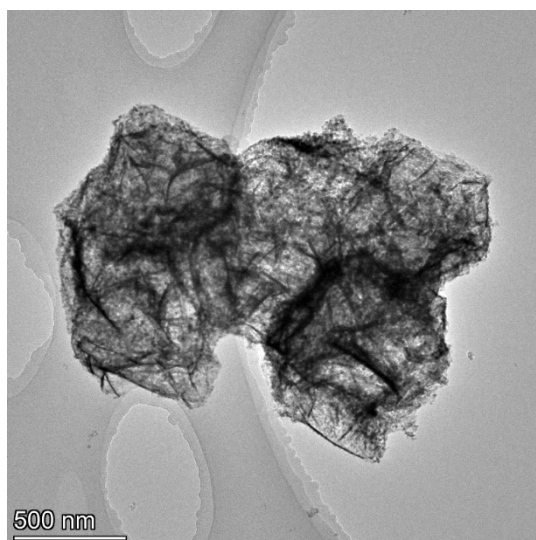

**SFig. 3** TEM image of ZnO-Co<sub>3</sub>O<sub>4</sub> derived from ZIF-8-ZIF67.

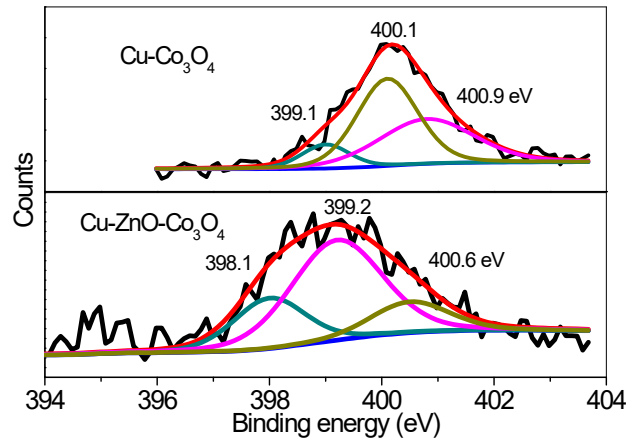

**SFig. 4** XPS spectra of Ni1s of the Cu-ZnO-Co<sub>3</sub>O<sub>4</sub> and Cu-Co<sub>3</sub>O<sub>4</sub>.

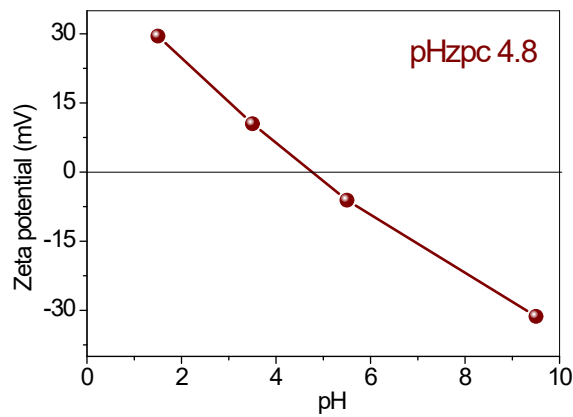

**SFig. 5** Zeta potential of Cu-ZnO-Co<sub>3</sub>O<sub>4</sub> as a function of pH in water.

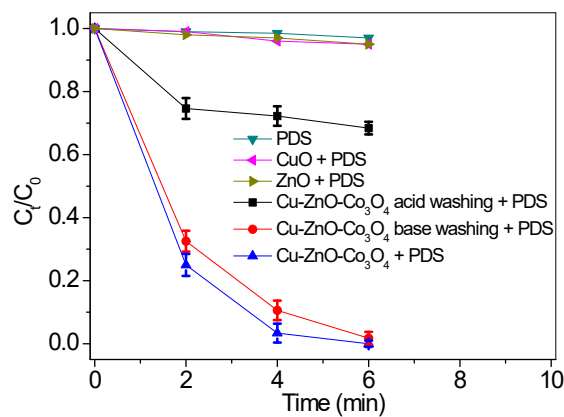

**SFig. 6** BPA degradation under different conditions. [0.1 g·L<sup>-1</sup> catalyst, 20 mg·L<sup>-1</sup> BPA, 0.1 g·L<sup>-1</sup> PDS]

As shown in SFig.6, the PDS could not result in the degradation of BPA under the present reaction. Besides, the very slight degradation of BPA was achieved in the ZnO, CuO and Co<sub>3</sub>O<sub>4</sub> in presence of PDS. Furthermore, it was suggested that after KOH treatment, a slight loss of the BPA degradation efficiency of Cu-ZnO-Co<sub>3</sub>O<sub>4</sub> as indicated by the apparent degradation rate of 0.66

min<sup>-1</sup> (R<sup>2</sup>= 0.97) was observed possibly because the ZnO nanoparticles could be leached due to the reaction of  $ZnO + 2KOH + H_2O = K_2[Zn(OH)_4]$  and Cu doped Co<sub>3</sub>O<sub>4</sub> could be almost remained. However, after treating with H<sub>2</sub>SO<sub>4</sub>, both ZnO and Co<sub>3</sub>O<sub>4</sub> nanoparticles in the composite could be almost removed and it was reasonable that a significant loss of the activity as suggested by the apparent degradation rate of 0.06 min<sup>-1</sup> (R<sup>2</sup>= 0.67) was observed. Thus, in the composite, the Cu doped Co<sub>3</sub>O<sub>4</sub> nanoparticles and slight carbon species in the composite could be responsible for the activation of PDS.

**Treatment condition:** 5 mg of ZnO, CuO and Co<sub>3</sub>O<sub>4</sub> were employed as catalyst, respectively. 5 mg of Cu-ZnO-Co<sub>3</sub>O<sub>4</sub> were washed by 2 mL 0.5 M H<sub>2</sub>SO<sub>4</sub> and 0.5 M KOH under sonication for 5 min to remove metal oxides and ZnO in the composite, respectively. After washed by distilled water for twice, the remained solids were used for BPA degradation with PDS.

**STable 2** Comparison of BPA degradation activities over different catalysts

| Catalysts      | Condition                | Performances            | TOC (%)    | Refs. |
|----------------|--------------------------|-------------------------|------------|-------|
| N-doped carbon | ([BPA] = 20 mg/L, [PDS]) | 0.126 min <sup>-1</sup> | 65.9 in 20 | 1     |

|                                                                                         |                                                                                                                                                                                                    |                         |                 |           |
|-----------------------------------------------------------------------------------------|----------------------------------------------------------------------------------------------------------------------------------------------------------------------------------------------------|-------------------------|-----------------|-----------|
| nanoparticles                                                                           | =3.25 mM, [Catalyst] = 0.12 g/L, and initial solution pH=7.0)                                                                                                                                      |                         | min             |           |
| CuO decorated on hexagonal boron nitride mesoporous silica spheres-doping CuO (CuO/MSS) | [BPA] = 5 mg L <sup>-1</sup> , [PDS] = 0.5 g L <sup>-1</sup> , [CuBN-4] = 2.0 g L <sup>-1</sup> , and pH = 4–5. [BPA] = 50 mg/L, [catalyst] = 1.5 g/L, [PDS] = 100 mM, temperature = 25 °C, pH = 7 | 0.1 min <sup>-1</sup>   | 82 in 150 min   | 2         |
| Zn-OMS-2                                                                                | BPA (20 mg L <sup>-1</sup> ), Zn-OMS-2, (0.5 g L <sup>-1</sup> ), PDS (0.5 g L <sup>-1</sup> )                                                                                                     | 85% removal in 26 min   | 53 in 55 min    | 4         |
| RC/CNTs/Fe <sub>3</sub> O <sub>4</sub>                                                  | [Catalyst] <sub>0</sub> = 0.2 g/L, [PDS] <sub>0</sub> = 0.05 mM, pH <sub>0</sub> = 6.07, [BPA] <sub>0</sub> = 5 ppm, T = 30°C                                                                      | 0.157 min <sup>-1</sup> | 27.41 in 60 min | 5         |
| ZnCo <sub>2</sub> O <sub>4</sub> /NC                                                    | [Catalyst] <sub>0</sub> = 0.2 g/L, [PDS] <sub>0</sub> = 0.4 g L <sup>-1</sup> , pH = 7.6, [BPA] <sub>0</sub> = 20 ppm, T = 30°C                                                                    | 0.42 min <sup>-1</sup>  | 68 in 12 min    | 6         |
| Cu-ZnO-Co <sub>3</sub> O <sub>4</sub>                                                   | [Catalyst] <sub>0</sub> = 0.1 g/L, [PDS] <sub>0</sub> = 0.1 g L <sup>-1</sup> , pH = 7.6, [BPA] <sub>0</sub> = 20 ppm, T = 25°C                                                                    | 0.84 min <sup>-1</sup>  | 52 in 6 min     | This work |

## References:

- Yin, H. Y.; Yao, F. B.; Pi, Z. J.; Zhong, Y. He, L.; Hou, K. J.; Fu, J.; Chen, S. J.; Tao, Z.; Wang, D. B.; Li, X. M.; Yang, Q. Efficient degradation of bisphenol A via peroxydisulfate activation using in-situ N-doped carbon nanoparticles: Structure-function relationship and reaction mechanism. *J. Colloid Interf. Sci.* **2021**, *586*, 551.
- Sun, Z. J.; Zhu, Y. H.; Deng, Y. Liu, F. D.; Ruan, W. Q.; Xie, L. J.; Beadham, I. Nature of surface-active centers in activation of peroxydisulfate by CuO for degradation of BPA with non-radical pathway. *Colloids and Surf. A: Physicochemi. Eng. Aspect.* **2022**, *643*, 128731
- Sun, L.; Zhang, Z. Y.; Wan, F. L.; Bai, M. J.; Deng, X. Y.; Wang, L. Y. Activation of persulfate by mesoporous silica spheres-doping CuO for bisphenol A removal. *Environ. Res.* **2022**, *205*, 112529
- Li, J. M.; Hao, Z. X.; Jin, J.; Fang, C.; Yang, Z. H.; Meng, X.; Liu, X. Facile synthesis of Zn-OMS-2 nanorods for enhanced degradation of bisphenol A via PDS activation. *Inorga. Chem. Commun.* **2023**, *153*, 110791
- Dong, Y. D.; Zhang, L. Q.; Zhou, P.; Liu, Y.; Lin, H.; Zhong, G. J.; Yao, G.; Li, Z. M.; Lai, B. Natural cellulose supported carbon nanotubes and Fe<sub>3</sub>O<sub>4</sub> NPs as the efficient peroxydisulfate activator for the removal of bisphenol A: An enhanced non-radical oxidation process. *J. Hazard. Mater.* **2022**, *423*, 127054.
- Wang, J.; Huang, X. Q.; Bai, L. ZnCo<sub>2</sub>O<sub>4</sub>/NC Hollow Polyhedra for Bisphenol A Disposal and the Oxygen Evolution Reaction. *ACS Appl. Nano Mater.* **2024**, *7*, 10, 11900–11909.

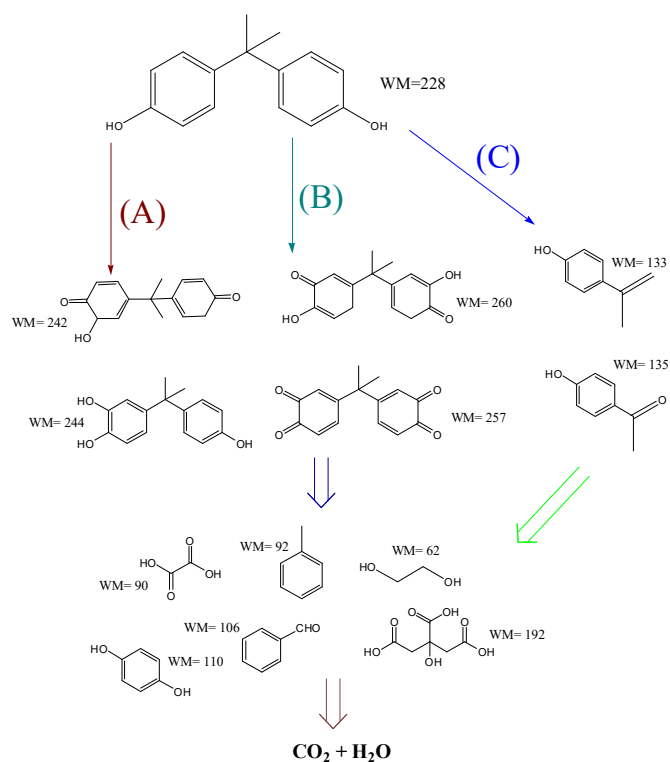

**Scheme 1** Possible degradation paths of BPA with Cu-ZnO-CO<sub>3</sub>O<sub>4</sub> and PDS.

The possible degradation pathways of BPA were proposed as present in Scheme 1. It was suggested that a composite degradation mechanism (radical and non-radical pathway) may occur during the BPA oxidation. It was found that the dehydrogenation (path A) and hydroxylation (path B) reactions were occurred for BPA to form monohydroxylated BPA ( $m/z = 243$ ) via hydroxylation, dehydroxylated bisphenol A ( $m/z = 259$ ) and BPA 4,5-quinone ( $m/z = 241$ ), respectively, which similarly could transform into 4-[2-(3,4-dihydroxyphenyl) propan-2-yl]-quinone ( $m/z = 257$ ) through sequential electron transfer reaction. In addition, the fragments such as 4-isopropenylphenol ( $m/z = 133$ ) and 4-hydroxyacetophenone ( $m/z = 135$ ) as well as hydroquinone ( $m/z = 133$ ), 4-isopropylphenol ( $m/z = 135$ ) and 2-phenylpropan-2-ol ( $m/z = 135$ ) demonstrated that BPA could undergo  $\beta$ -scission reaction (path C) and the direct C–C cleavage, which confirmed the existence of  $^1\text{O}_2$  generated by the catalyst and PDS. Finally, with the assistance of the active species, such as  $\text{SO}_4^{\cdot-}$ ,  $\text{HO}^{\cdot}$ ,  $\text{O}_2^{\cdot-}$  and  $^1\text{O}_2$ , the generated small organic molecules such as organic acids, acetone and phenol were further mineralized into harmless  $\text{CO}_2$  and  $\text{H}_2\text{O}$ .

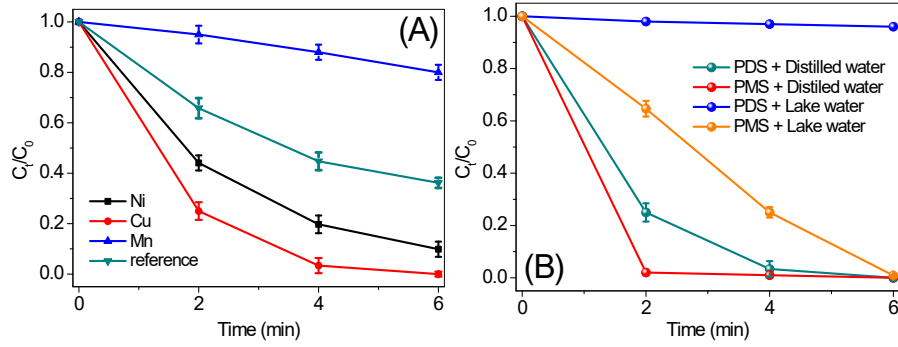

**SFig. 7** (A) BPA degradation in the presence of different catalysts (20 ppm BPA, 0.1 g/L catalyst, 0.1 g/L PDS) and (B) in the presence of Cu-ZnO-Co<sub>3</sub>O<sub>4</sub> under different condition (20 ppm BPA, 0.1 g/L catalyst, 0.1 g/L PDS or PMS).
